# Supplementary material
Source: MDPI journal article supplement (https://www.mdpi.com/2075-4701/14/2/155)
Supplement: s1 [file s1]

## Mechanistic Study in Gold Nanoparticle Synthesis through Microchip Laser Ablation in Organic Solvents

Barana Sandakelum Hettiarachchi,<sup>1</sup> Yusuke Takaoka,<sup>2</sup> Yuta Uetake,<sup>1,3</sup> Yumi Yakiyama,<sup>1,3,\*</sup> and Hiroshi Y. Yoshikawa,<sup>2</sup> Mihoko Maruyama,<sup>4</sup> Hidehiro Sakurai<sup>1,3,\*</sup>

<sup>1</sup>Division of Applied Chemistry, Graduate School of Engineering, Osaka University, 2-1 Yamada-oka, Suita, Osaka 565-0871, Japan

<sup>2</sup>Department of Applied Physics, Graduate School of Engineering, Osaka University, 2-1 Yamada-oka, Suita, Osaka 565-0871, Japan.

<sup>3</sup>Innovative Catalysis Science Division, Institute for Open and Transdisciplinary Research Initiatives (ICS-OTRI), Osaka University, 2-1 Yamada-oka, Suita, Osaka 565-0871, Japan

<sup>4</sup>Division of Electrical, Electronic and Infocommunications Engineering, Graduate School of Engineering, Osaka University, 2-1 Yamada-oka, Suita, Osaka 565-0871, Japan.

|                                                                                                      |    |
|------------------------------------------------------------------------------------------------------|----|
| <b>Figure S1.</b> Experimental setup for monitoring the bubble formation with the aid of videography | S2 |
| <b>Figure S2.</b> TEM images of Au:PVP (K-15) in organic solvents                                    | S2 |
| <b>Figure S3.</b> Viscosity effect on Au NPs productivity                                            | S3 |
| <b>Table S1.</b> Ablated total Au amount in the absence of PVP                                       | S3 |

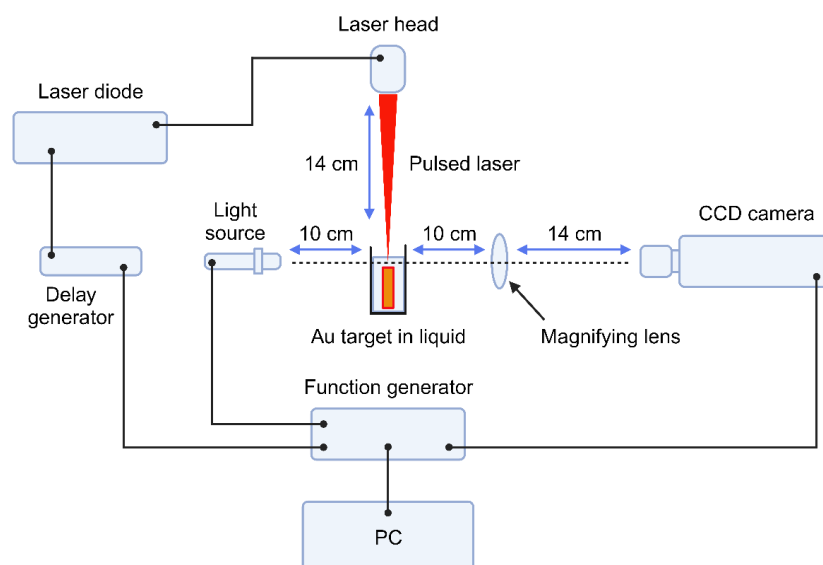

**Figure S1.** Experimental setup for monitoring the bubble formation with the aid of videography.

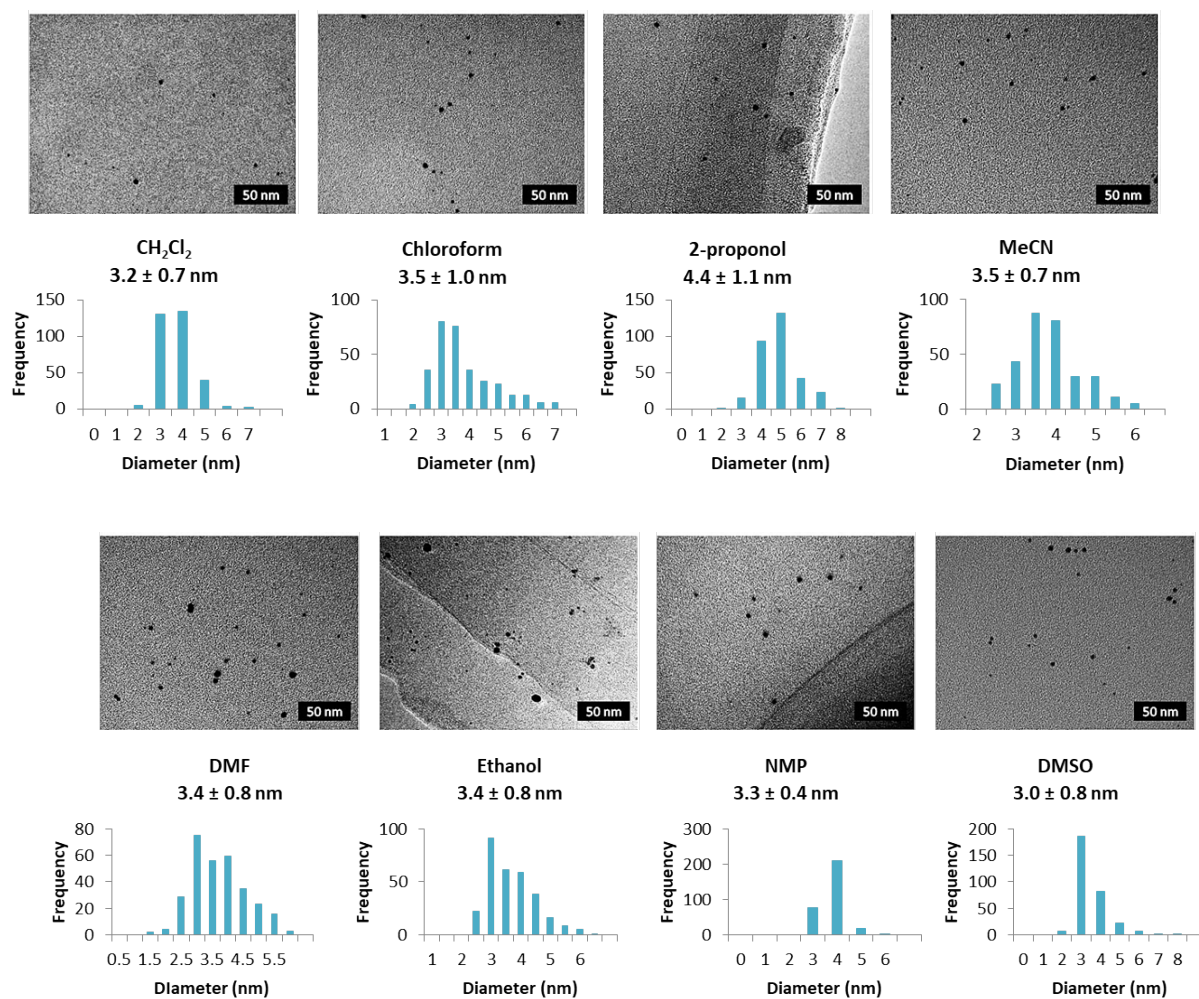

**Figure S2.** TEM images of Au:PVP (K-15) in organic solvents. Laser wavelength, 1064 nm; pulse energy, 1.8 mJ; pulse duration, 900 ps; average laser power, 180 mW; repetition rate, 100 Hz. Laser irradiation time was fixed in 60 min for all the samples.

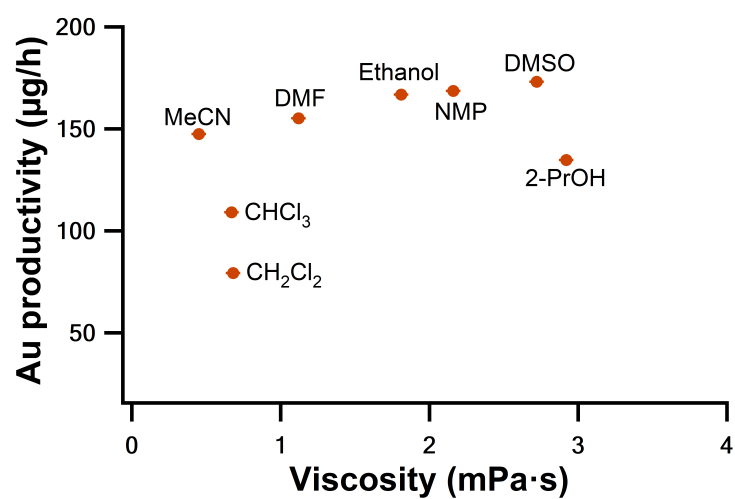

**Figure S3.** Viscosity effect on Au NPs productivity.

**Table S1.** Ablated total Au amount in the absence of PVP.

| Solvent <sup>a</sup>            | Au productivity (µg/h) |
|---------------------------------|------------------------|
| CH <sub>2</sub> Cl <sub>2</sub> | 40.7                   |
| Chloroform                      | 40.3                   |
| 2-PrOH                          | 125.3                  |
| MeCN                            | 148.9                  |
| DMF                             | 146.9                  |
| Ethanol                         | 152.4                  |
| NMP                             | 157.8                  |
| DMSO                            | 183.8                  |

<sup>a</sup> In organic solvent (15 mL).
